# Supplementary material for: Assessment of neutrophil-to-lymphocyte ratio, platelet-to-lymphocyte ratio and platelet count as predictors of long-term outcome after R0 resection for colorectal cancer
Source: PubMed Central journal article supplement (PMC5431463; doi:10.1038/s41598-017-01652-0), 2017-05-04
Supplement: 41598_2017_1652_MOESM1_ESM.pdf [file 41598_2017_1652_MOESM1_ESM.pdf]

**Title:** Assessment of neutrophil-to-lymphocyte ratio, platelet-to-lymphocyte ratio and platelet count as predictors of long-term outcome after R0 resection for colorectal cancer.

**Authors:** Corrado Pedrazzani,\*<sup>1</sup> Guido Mantovani,<sup>1</sup> Eduardo Fernandes,<sup>2</sup> Fabio Bagante,<sup>1</sup> Gian Luca Salvagno,<sup>3</sup> Niccolò Surci,<sup>1</sup> Tommaso Campagnaro,<sup>1</sup> Andrea Ruzzenente,<sup>1</sup> Elisa Danese,<sup>3</sup> Giuseppe Lippi,<sup>3</sup> Alfredo Guglielmi.<sup>1</sup>

**Authors' affiliation:** <sup>1</sup>Division of General and Hepatobiliary Surgery, Department of Surgical Sciences, Dentistry, Gynecology and Pediatrics, University of Verona, Verona, Italy; <sup>2</sup>Division of Minimally Invasive, General and Robotic Surgery, University of Illinois at Chicago, Chicago, US; <sup>3</sup>Section of Clinical Biochemistry, Department of Neurological, Biomedical and Movement Sciences, University of Verona, Verona, Italy

**Correspondence to:** Dott. Corrado Pedrazzani, Chirurgia Generale e Epatobiliare, Policlinico "G.B. Rossi", Piazzale Scuro 10, 37134 Verona, Italia. Tel: ++39 (0)45 8124464-4655; Fax: ++39 (0)45 8027426; E-mail: corrado.pedrazzani@univr.it

**Table S1.** Multivariable survival analysis including platelet-to-lymphocyte ratio (PLR) for the 603 patients under study.

|                              | Overall Survival  |         | Cancer-related Survival |         |
|------------------------------|-------------------|---------|-------------------------|---------|
|                              | HR (95% CI)       | p value | HR (95% CI)             | p value |
| Age (years)                  |                   | <0.001  |                         | 0.013   |
| ≤ 68.9 years                 | -                 |         | -                       |         |
| > 68.9 years                 | 3.14 (2.18-4.53)  |         | 1.75 (1.13-2.71)        |         |
| Gender                       |                   | 0.058   |                         | 0.058   |
| Female                       | -                 |         | -                       |         |
| Male                         | 1.39 (0.99-1.95)  |         | 1.56 (0.99-2.45)        |         |
| Histological Type            |                   | 0.66    |                         | 0.11    |
| Adenocarcinoma               | -                 |         | -                       |         |
| Mucinous                     | 0.91 (0.59-1.38)  |         | 0.62 (0.34-1.12)        |         |
| TNM Stage                    |                   | <0.001  |                         | <0.001  |
| Stage I                      | -                 |         | -                       |         |
| Stage II                     | 1.55 (0.87-2.74)  |         | 2.67 (0.89-7.96)        |         |
| Stage III                    | 2.83 (1.61-4.97)  |         | 9.59 (3.41-26.99)       |         |
| Stage IV                     | 7.11 (3.79-13.33) |         | 30.63 (10.58-86.67)     |         |
| Platelet-to-lymphocyte ratio |                   | 0.034   |                         | 0.22    |
| L-PLR                        | -                 |         | -                       |         |
| H-PLR                        | 1.86 (1.05-3.32)  |         | 1.64 (0.74-3.62)        |         |

<sup>a</sup> Values in parentheses are 95% confidence intervals. Hazard ratio and p values were derived from Cox regression analysis, controlling for all other variables.

**Table S2.** Multivariable survival analysis including platelet count (PC) for the 603 patients under study.

|                   | Overall Survival |         | Cancer-related Survival |         |
|-------------------|------------------|---------|-------------------------|---------|
|                   | HR (95% CI)      | p value | HR (95% CI)             | p value |
| Age (years)       |                  | <0.001  |                         | 0.013   |
| ≤ median          | -                |         | -                       |         |
| > median          | 3.15 (2.18-4.53) |         | 1.73 (1.12-2.67)        |         |
| Gender            |                  | 0.033   |                         | 0.046   |
| Female            | -                |         | -                       |         |
| Male              | 1.45 (1.03-2.05) |         | 1.59 (1.01-2.51)        |         |
| Histological Type |                  | 0.49    |                         | 0.09    |
| Adenocarcinoma    | -                |         | -                       |         |
| Mucinous          | 0.86 (0.57-1.31) |         | 0.59 (0.33-1.08)        |         |
| TNM Stage         |                  | <0.001  |                         | <0.001  |
| Stage I           | -                |         | -                       |         |
| Stage II          | 1.53 (0.86-2.71) |         | 2.59 (0.87-7.71)        |         |
| Stage III         | 2.76 (1.57-4.85) |         | 9.18 (3.26-25.84)       |         |
| Stage IV          | 6.81 (3.62-12.8) |         | 30.06 (10.37-87.14)     |         |
| Platelet count    |                  | 0.036   |                         | 0.07    |
| L-PC              | -                |         | -                       |         |
| H-PC              | 1.48 (1.03-2.13) |         | 1.53 (0.96-2.45)        |         |

<sup>a</sup> Values in parentheses are 95% confidence intervals. Hazard ratio and p values were derived from Cox regression analysis, controlling for all other variables.

## Figure legends

**Figure S1.** Receiver Operating Characteristic curves plotting the true-positive rate (sensitivity) against the false-positive rate (1-specificity) at various threshold of a) NLR, b) PLR, and c) PC as predictors of overall survival.

**Figure S2.** Kaplan-Meier curves for a) overall survival ( $p=0.070$ ) and b) cancer-related survival ( $p=0.239$ ) stratified by PLR

**Figure S3.** Kaplan-Meier curves for a) overall survival ( $p=0.122$ ) and b) cancer-related survival ( $p=0.151$ ) stratified by PC

**Figure S4.** Linear regression analysis modelling the relationship between age and NLR in a) CRC patients ( $r=0.076$ ;  $r^2=0.006$ ;  $p=0.063$ ) and b) control population ( $r=0.008$ ;  $r^2=0.000$ ;  $p=0.560$ )

**Figure S5.** Linear regression analysis modelling the relationship between age and PLR in a) CRC patients ( $r=0.015$ ;  $r^2=0.000$ ;  $p=0.727$ ) and b) control population ( $r=0.068$ ;  $r^2=0.005$ ;  $p<0.001$ )

**Figure S6.** Linear regression analysis modelling the relationship between age and PC in a) CRC patients ( $r=0.155$ ;  $r^2=0.024$ ;  $p<0.001$ ) and b) control population ( $r=0.056$ ;  $r^2=0.003$ ;  $p<0.001$ )

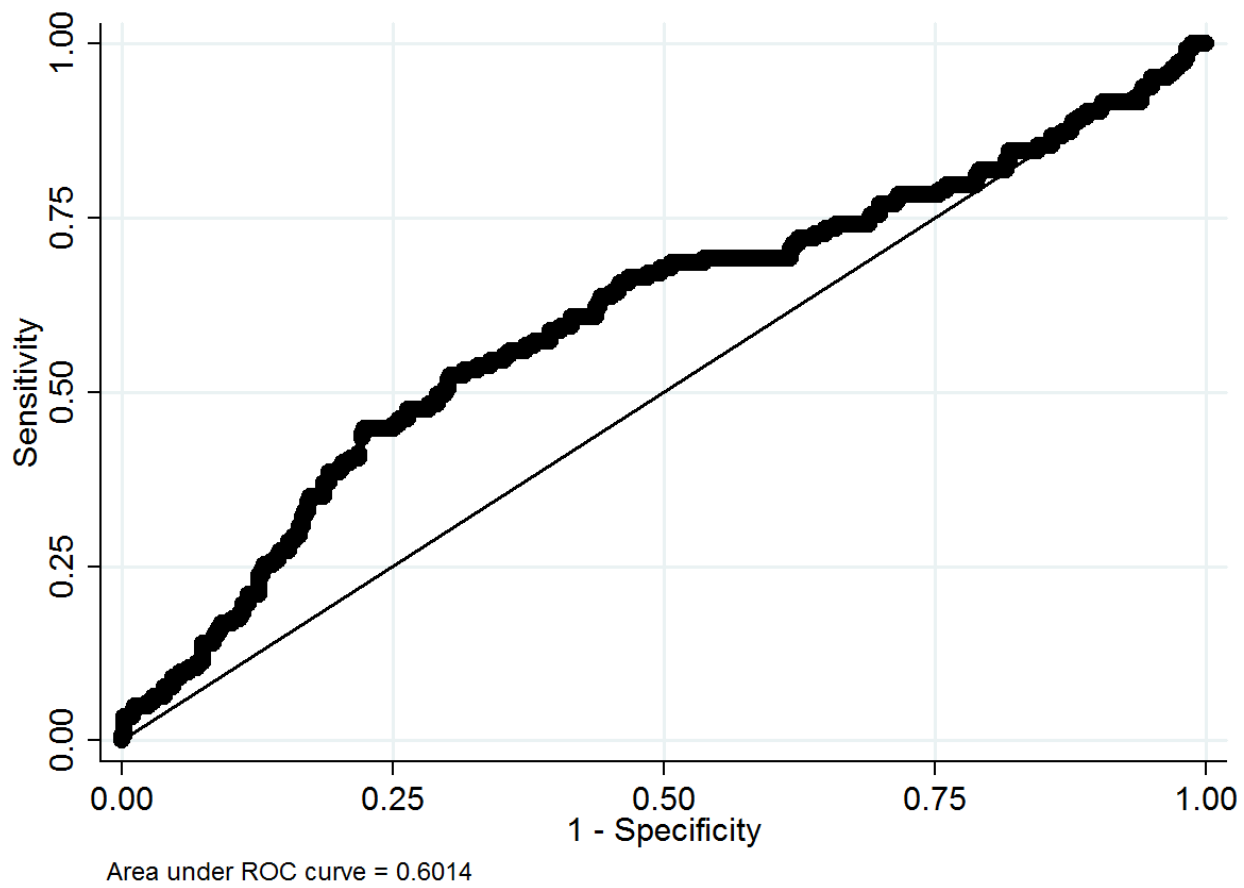

Figure S1(a)

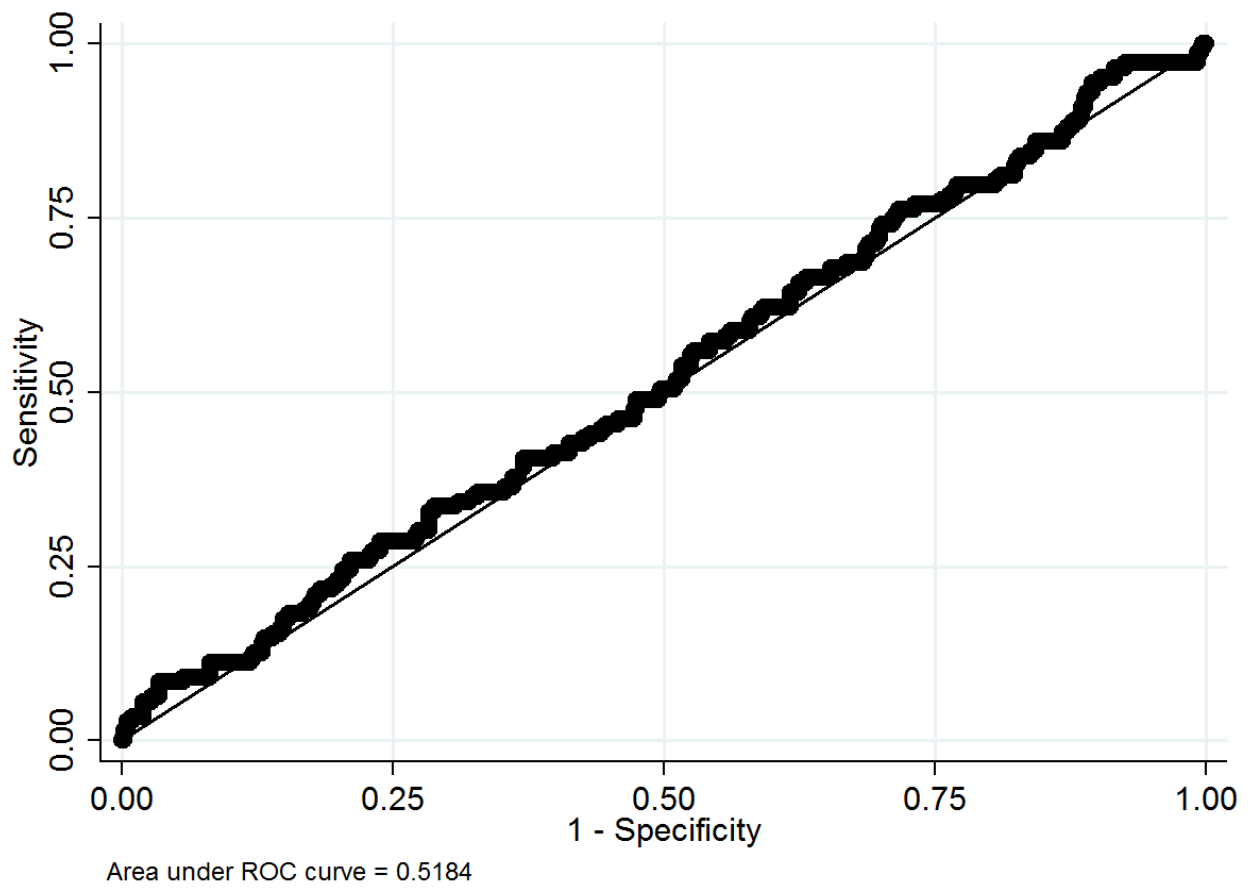

Figure S1(b)

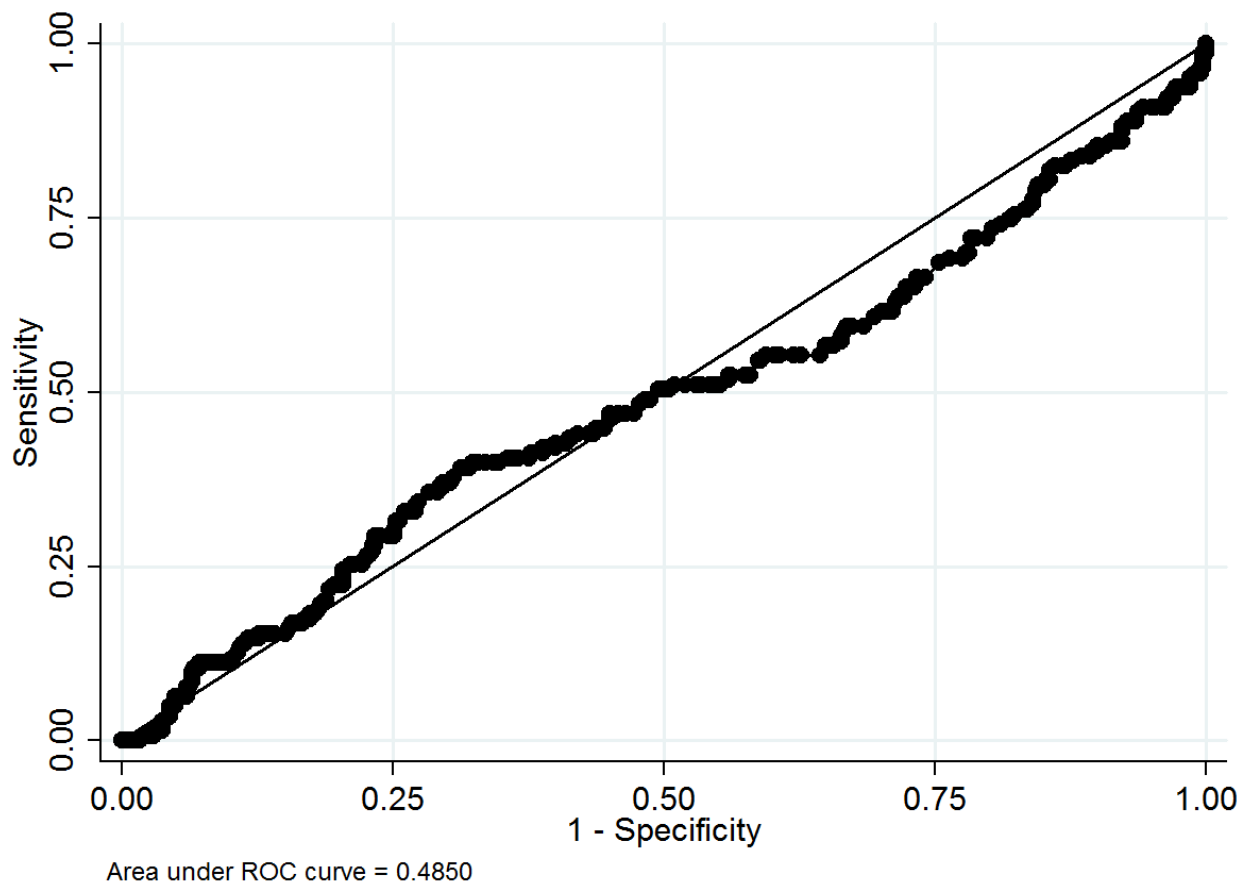

Figure S1(c)

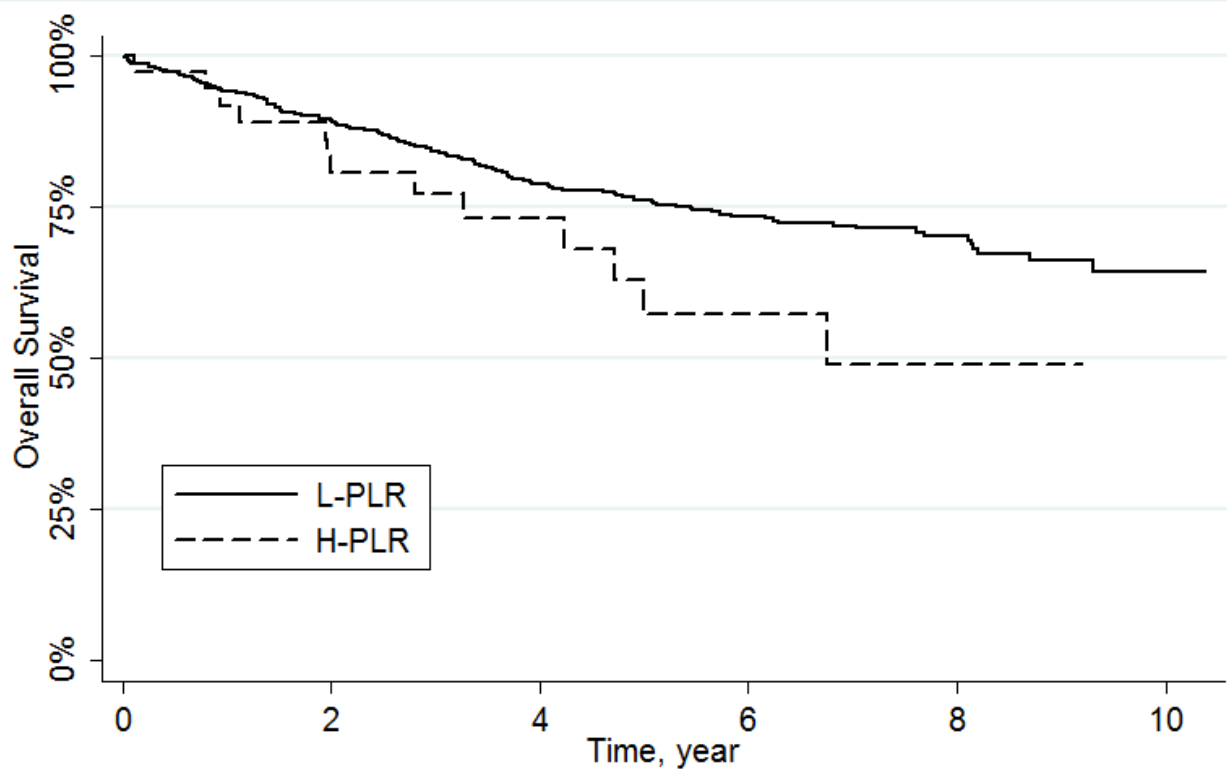

Figure S2(a)



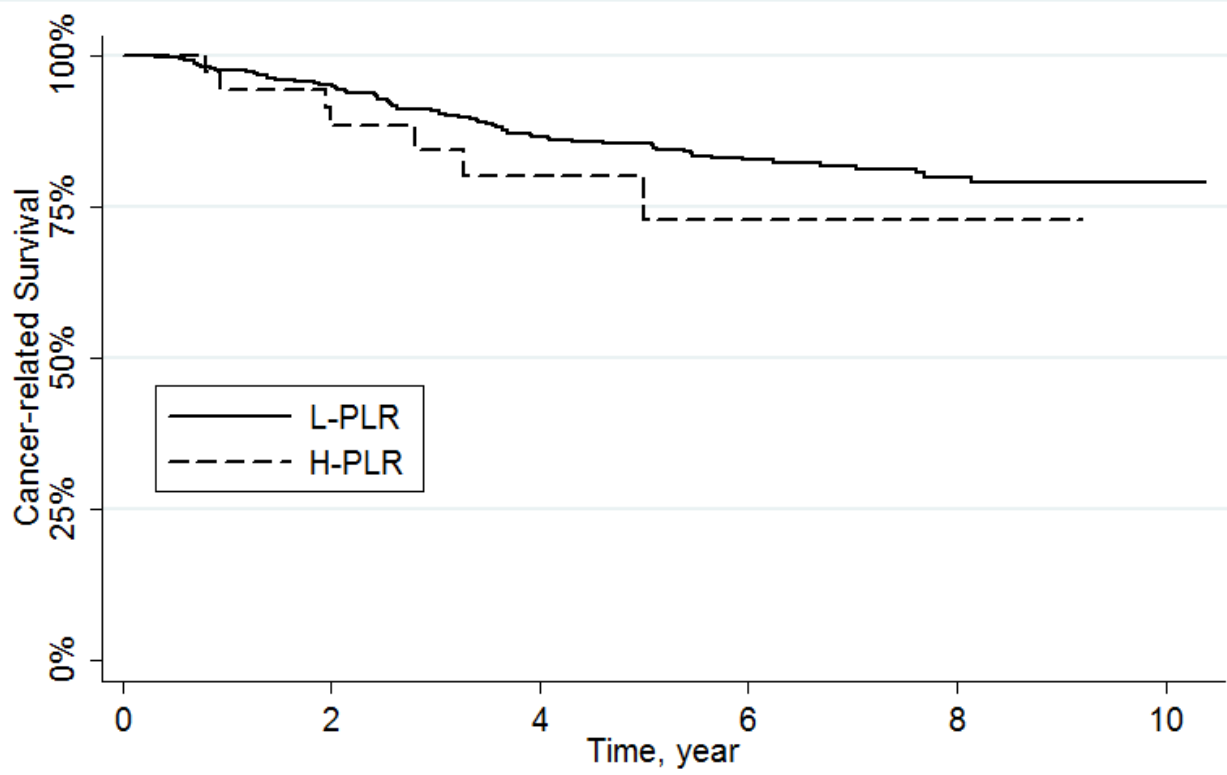

Figure S2(b)

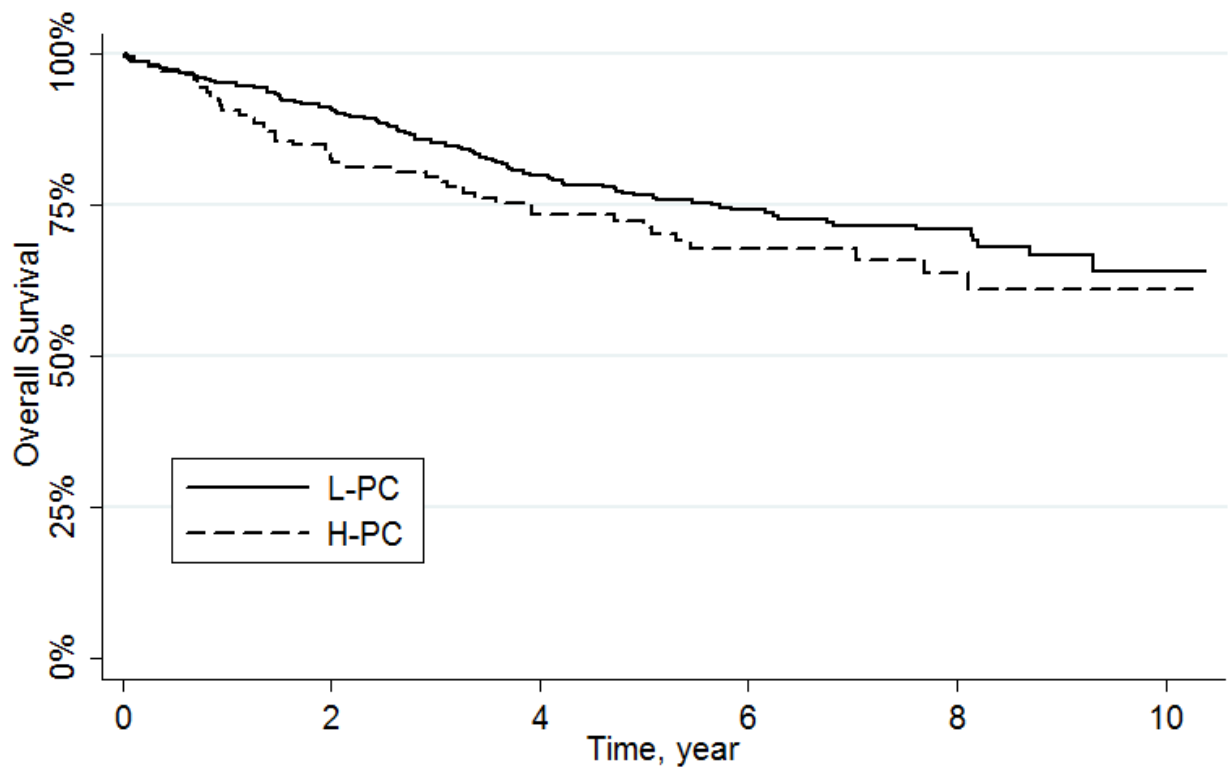

Figure S3(a)

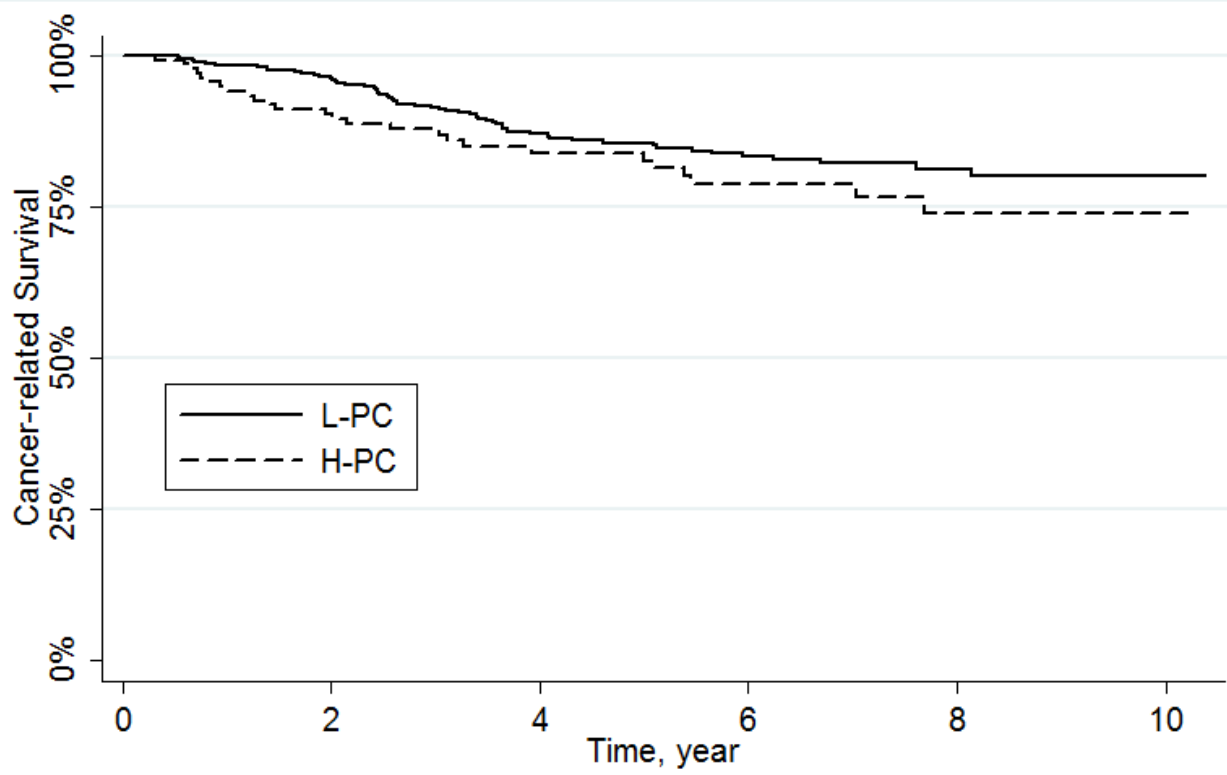

Figure S3(b)

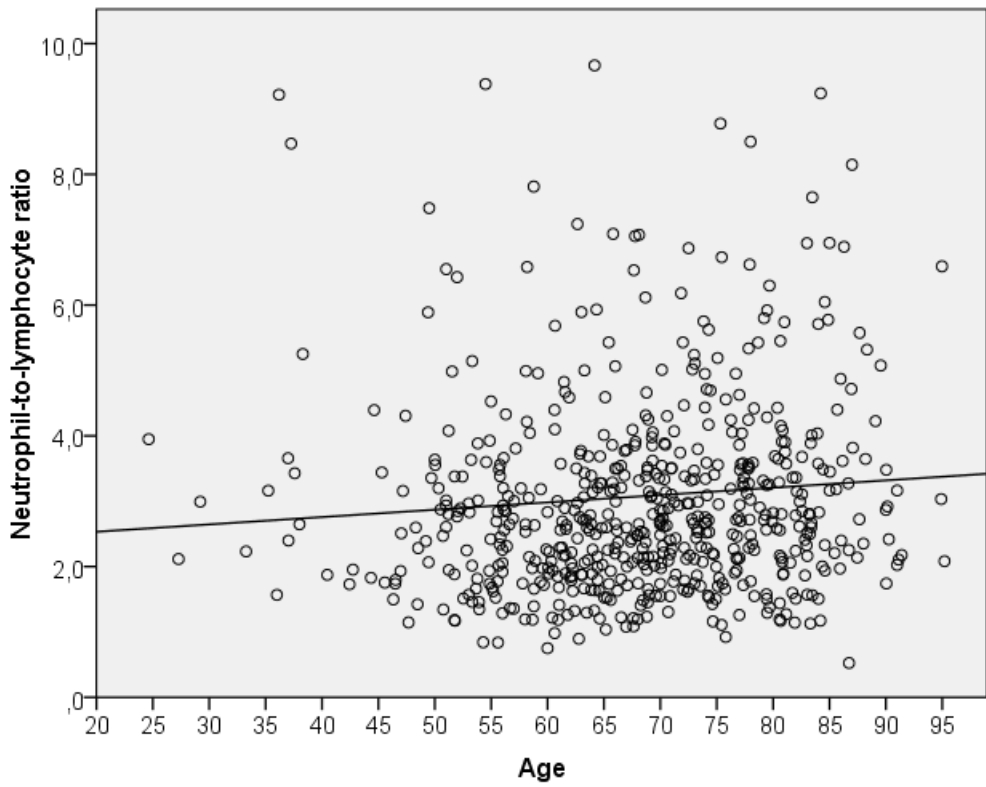

Figure S4(a)

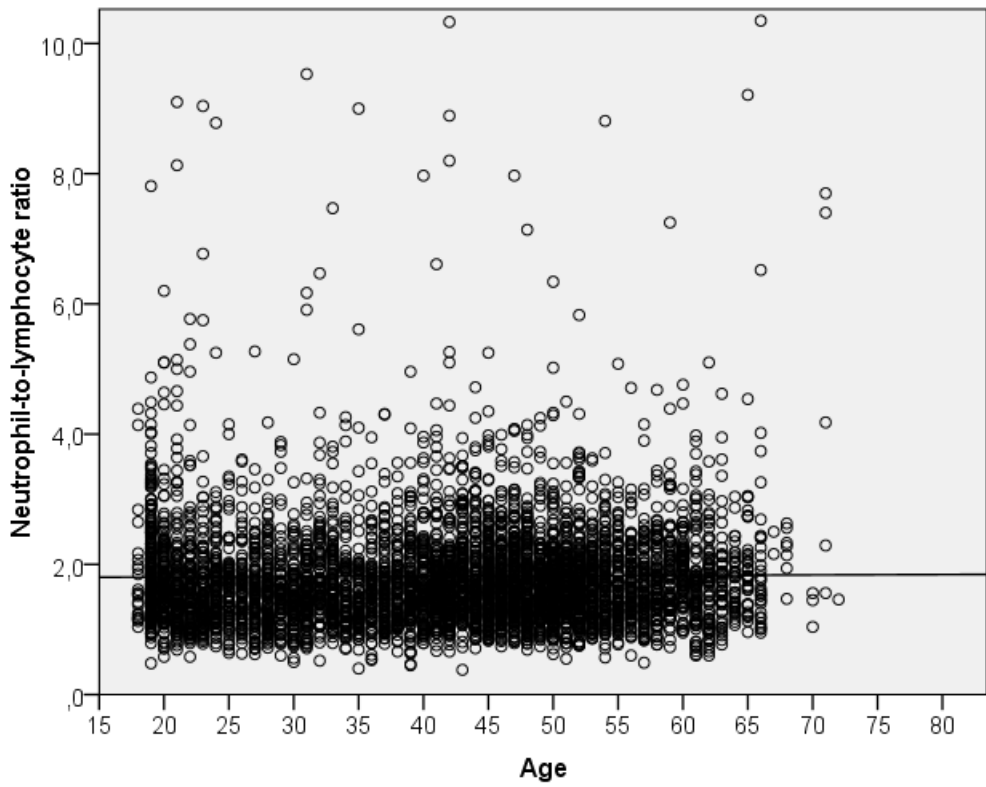

Figure S4(a)

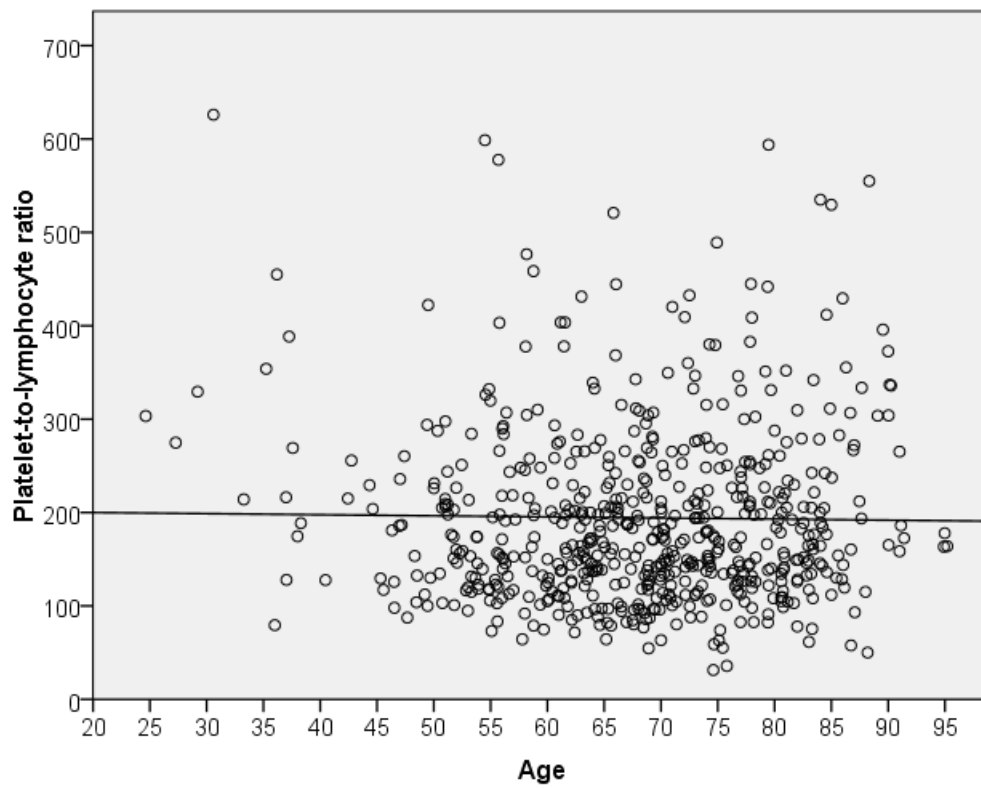

Figure S5(a)

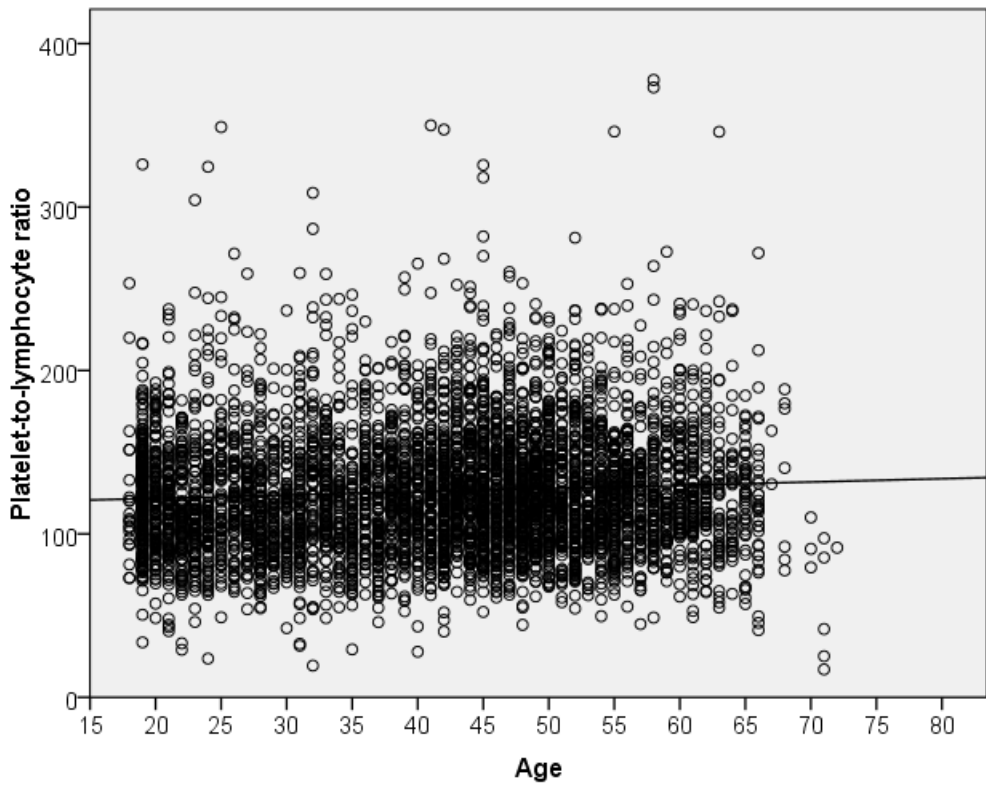

Figure S5(b)

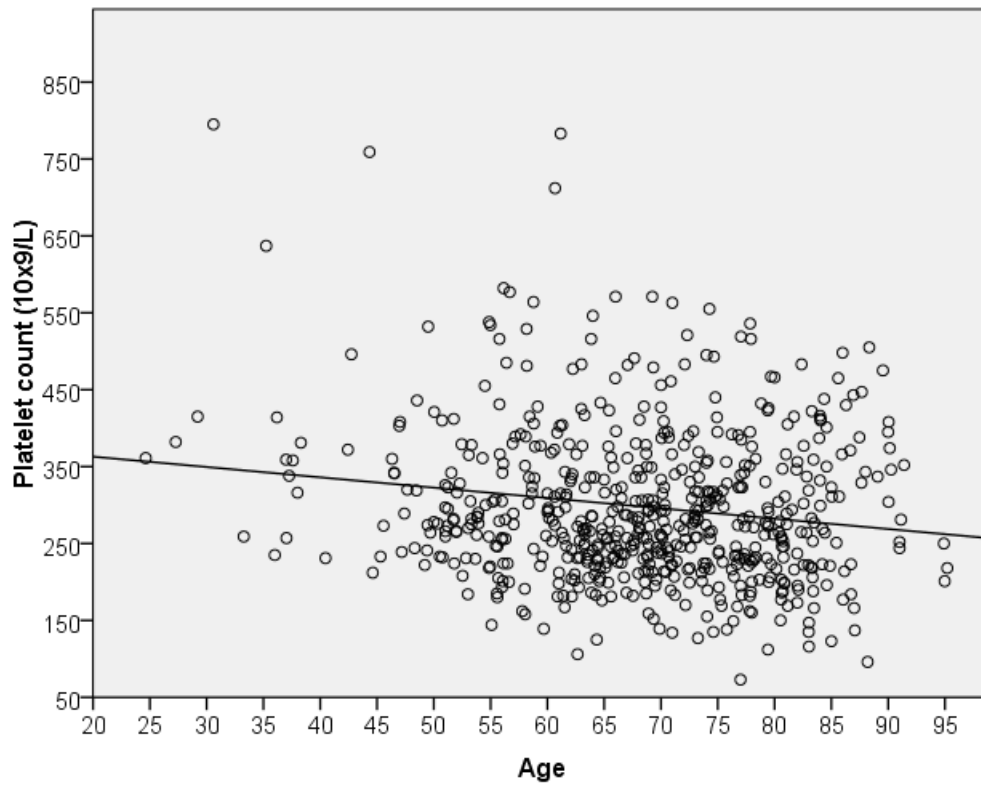

Figure S6(a)



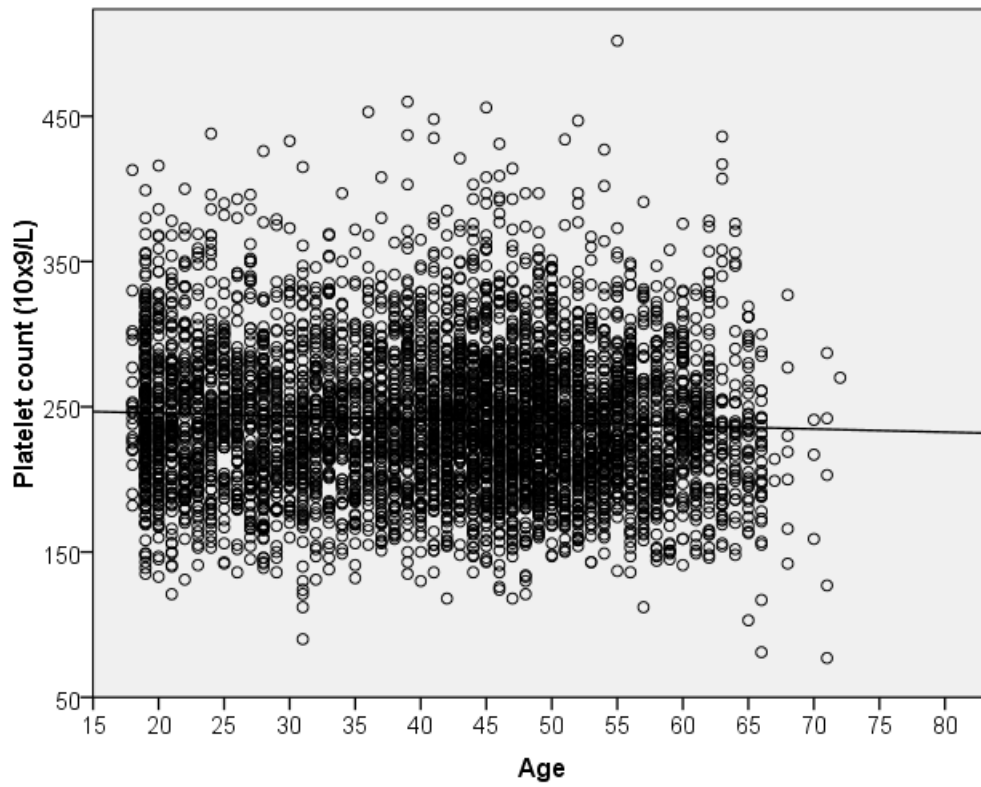

Figure S6(b)
